# Supplementary material for: Prognostic value of circulating tumor DNA in pancreatic cancer: a systematic review and meta-analysis
Source: publisher site journal article supplement (doi:10.18632/aging.202199), 2020-12-09
Supplement: Supplementary file [file aging-v13i2-202199-supplementary-material-SD1.pdf]

SUPPLEMENTARY FIGURE

A

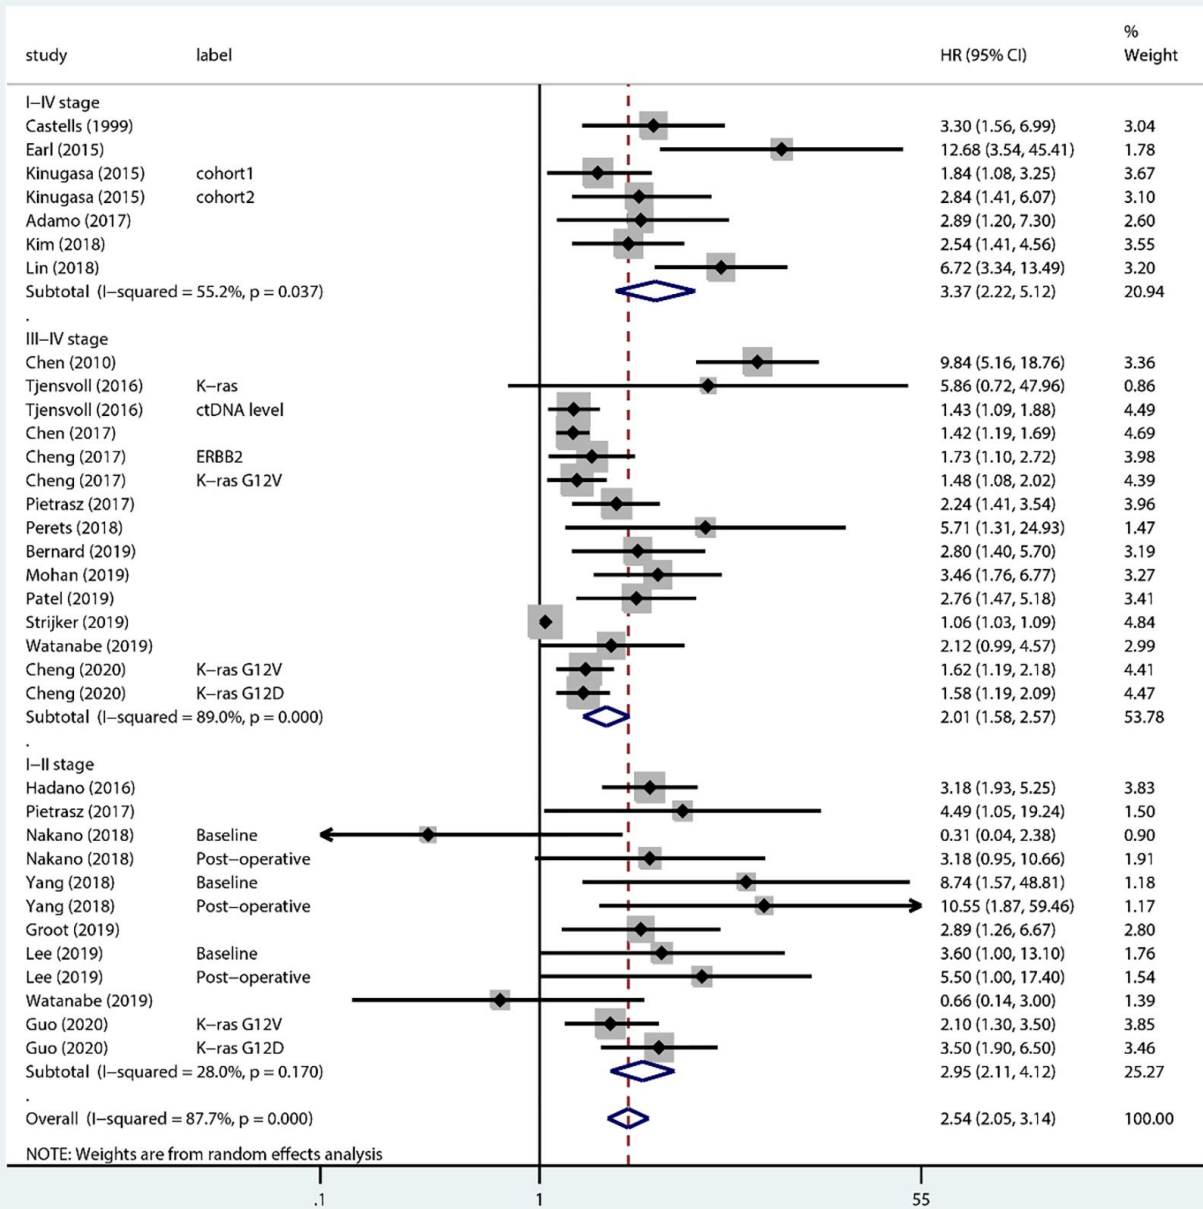

**B**

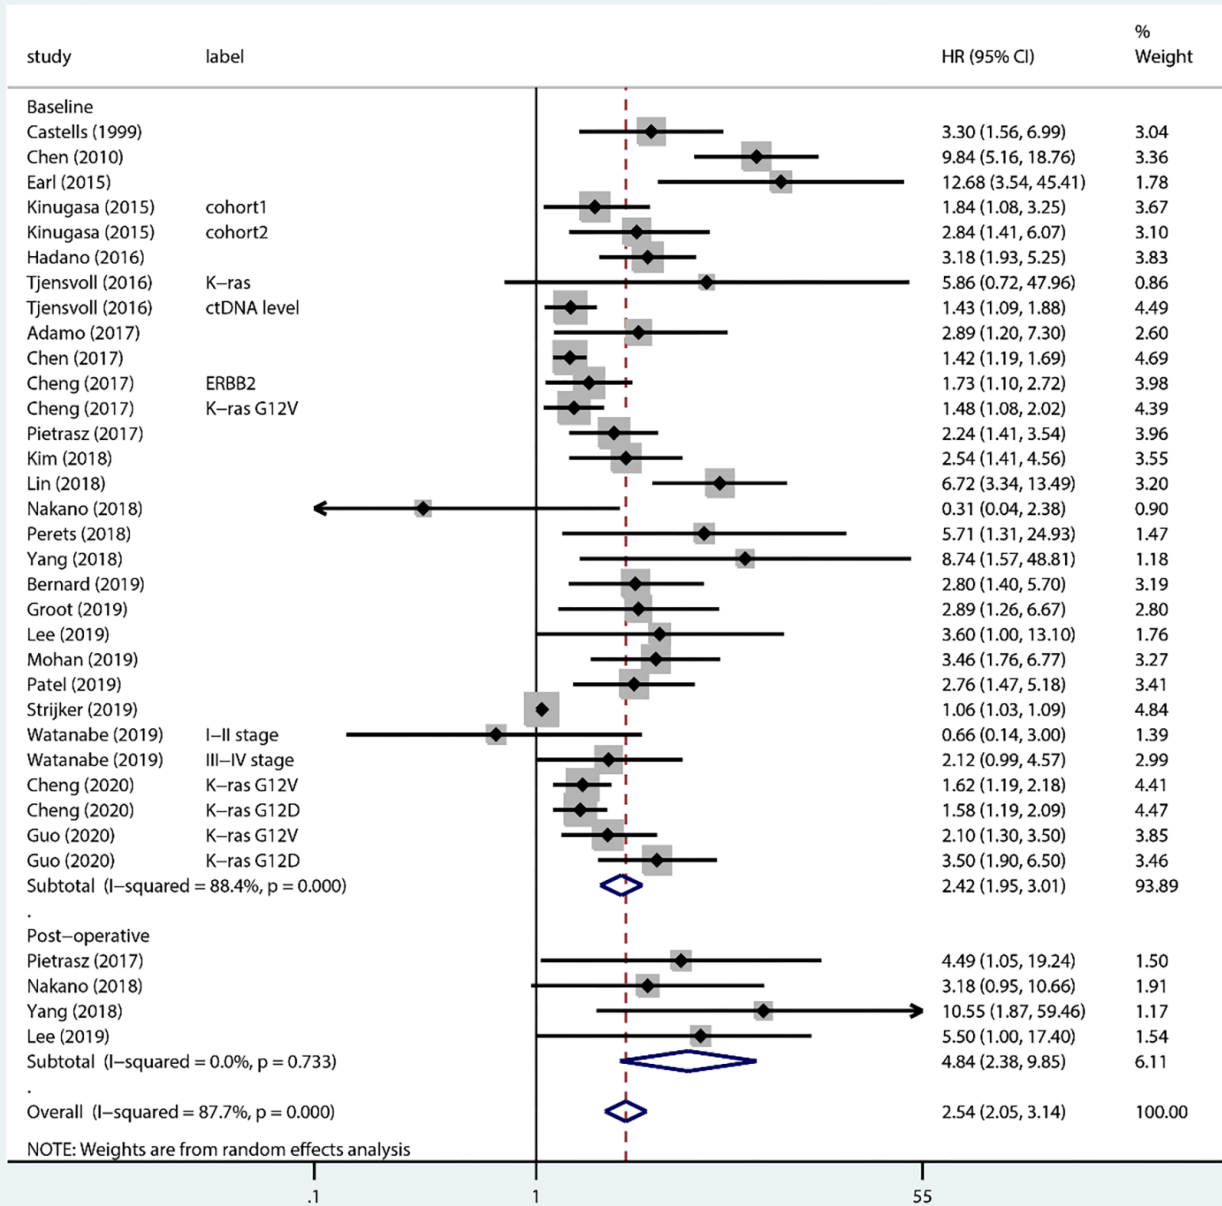

C

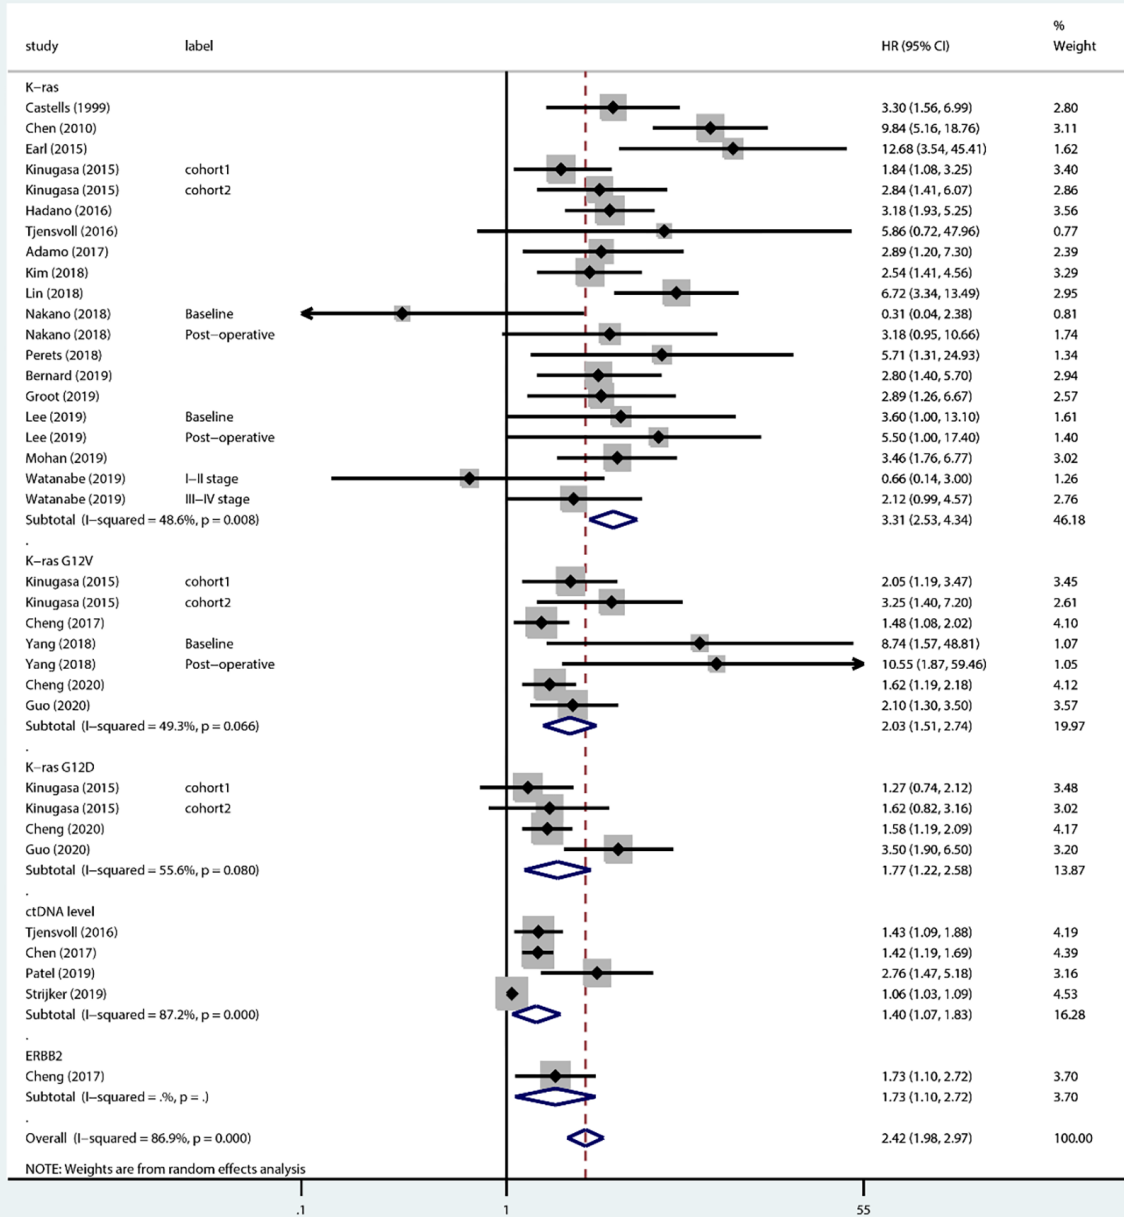

**Supplementary Figure 1.** (A) Subgroup analyses of OS according to tumor stage. (B) Subgroup analyses of OS according to sampling time. (C) Subgroup analyses of OS according to detection marker.
